# Supplementary material for: Irisin and Cardiometabolic Disorders in Obesity: A Systematic Review
Source: Int J Inflam. 2023 Oct 19;2023:5810157. doi: 10.1155/2023/5810157 (PMC10602702; doi:10.1155/2023/5810157)
Supplement: Supplementary Materials — PICO spreadsheet of the studies analyzed in this systematic review and PRISMA checklist for systematic reviews. [file 5810157.f1.zip]

Archive with 2 entries (2 files):
- Supplementary material Table S1. PICO spreadsheet.pdf
- Supplementary material. PRISMA Checklist.pdf
